# Supplementary material for: An open-label randomized pragmatic non-inferiority pilot trial to compare the effectiveness of Dysentery compound with individualized homeopathic medicines in irritable bowel syndrome
Source: publisher site journal article supplement (doi:10.1515/jcim-2018-0217), 2019-06-14
Supplement: Supplementary file 1 [file sUPPLEMENTARY IBSQOL questionnaire Bengali version.pdf › sUPPLEMENTARY IBSQOL questionnaire Bengali version.pdf]

Irritable Bowel Syndrome Quality of Life Questionnaire (অনুবাদিত বাংলা সংস্করণ)

**নির্দেশ:** নিচে আপনার পায়খানার সমস্যা সংক্রান্ত ৩৪টি প্রশ্ন এবং প্রত্যেক প্রশ্নের সঙ্গে সম্ভাব্য ৫টি উত্তর দেওয়া আছে। গত ১ মাসের কথা মনে করে প্রত্যেক প্রশ্নের সঙ্গে দেওয়া উপযুক্ত বক্সে টিক চিহ্ন দিয়ে সঠিক উত্তরটি জানান। অনুগ্রহ করে খেয়াল রাখুন যে প্রত্যেক প্রশ্নের উত্তর দিয়েছেন কিনা।

|                                                                                 |                                      |                                  |                                   |                                     |                                   |
|---------------------------------------------------------------------------------|--------------------------------------|----------------------------------|-----------------------------------|-------------------------------------|-----------------------------------|
| ১. পায়খানার সমস্যার কারণে আমি অসহায় বোধ করি।                                  | <input type="checkbox"/> একেবারেই না | <input type="checkbox"/> সামান্য | <input type="checkbox"/> মাঝামাঝি | <input type="checkbox"/> বেশ কিছুটা | <input type="checkbox"/> খুব বেশি |
| ২. পায়খানার দুর্গন্ধের কারণে আমি বিচলিত বোধ করি।                               | <input type="checkbox"/> একেবারেই না | <input type="checkbox"/> সামান্য | <input type="checkbox"/> মাঝামাঝি | <input type="checkbox"/> বেশ কিছুটা | <input type="checkbox"/> খুব বেশি |
| ৩. পায়খানায় গেলে যে পরিমাণ সময় লাগে, তাতে আমি বিচলিত বোধ করি।                | <input type="checkbox"/> একেবারেই না | <input type="checkbox"/> সামান্য | <input type="checkbox"/> মাঝামাঝি | <input type="checkbox"/> বেশ কিছুটা | <input type="checkbox"/> খুব বেশি |
| ৪. পায়খানার সমস্যা আমার শরীরে অন্য রোগ সৃষ্টি করতে পারে বলে আমার মনে হয়।      | <input type="checkbox"/> একেবারেই না | <input type="checkbox"/> সামান্য | <input type="checkbox"/> মাঝামাঝি | <input type="checkbox"/> বেশ কিছুটা | <input type="checkbox"/> খুব বেশি |
| ৫. পায়খানার সমস্যার কারণে আমার পেট ফেঁপে আছে বলে মনে হয়।                      | <input type="checkbox"/> একেবারেই না | <input type="checkbox"/> সামান্য | <input type="checkbox"/> মাঝামাঝি | <input type="checkbox"/> বেশ কিছুটা | <input type="checkbox"/> খুব বেশি |
| ৬. পায়খানার সমস্যার কারণে আমি জীবনের উপর নিয়ন্ত্রণ হারিয়ে ফেলছি বলে মনে হয়। | <input type="checkbox"/> একেবারেই না | <input type="checkbox"/> সামান্য | <input type="checkbox"/> মাঝামাঝি | <input type="checkbox"/> বেশ কিছুটা | <input type="checkbox"/> খুব বেশি |
| ৭. পায়খানার সমস্যার কারণে আমার জীবনের উপভোগ্যতা কমে গেছে।                      | <input type="checkbox"/> একেবারেই না | <input type="checkbox"/> সামান্য | <input type="checkbox"/> মাঝামাঝি | <input type="checkbox"/> বেশ কিছুটা | <input type="checkbox"/> খুব বেশি |
| ৮. পায়খানার সমস্যার ব্যাপারে কথা বলতে আমি অস্বস্তি বোধ করি।                    | <input type="checkbox"/> একেবারেই না | <input type="checkbox"/> সামান্য | <input type="checkbox"/> মাঝামাঝি | <input type="checkbox"/> বেশ কিছুটা | <input type="checkbox"/> খুব বেশি |
| ৯. পায়খানার সমস্যার কারণে আমি হতাশ বোধ করি।                                    | <input type="checkbox"/> একেবারেই না | <input type="checkbox"/> সামান্য | <input type="checkbox"/> মাঝামাঝি | <input type="checkbox"/> বেশ কিছুটা | <input type="checkbox"/> খুব বেশি |
| ১০. পায়খানার সমস্যার কারণে আমি অন্যদের থেকে আলাদা হয়ে পড়ছি বলে মনে হয়।      | <input type="checkbox"/> একেবারেই না | <input type="checkbox"/> সামান্য | <input type="checkbox"/> মাঝামাঝি | <input type="checkbox"/> বেশ কিছুটা | <input type="checkbox"/> খুব বেশি |
| ১১. পায়খানার সমস্যার কারণে আমাকে খাবার পরিমাণের দিকে লক্ষ্য রাখতে হয়।         | <input type="checkbox"/> একেবারেই না | <input type="checkbox"/> সামান্য | <input type="checkbox"/> মাঝামাঝি | <input type="checkbox"/> বেশ কিছুটা | <input type="checkbox"/> খুব বেশি |
| ১২. পায়খানার সমস্যার কারণে শারীরিক মেলামেশা করা আমার কাছে কঠিন হয়ে উঠেছে।     | <input type="checkbox"/> একেবারেই না | <input type="checkbox"/> সামান্য | <input type="checkbox"/> মাঝামাঝি | <input type="checkbox"/> বেশ কিছুটা | <input type="checkbox"/> খুব বেশি |
| ১৩. পায়খানার সমস্যার কারণে আমি প্রায়শই মেজাজ হারিয়ে ফেলি।                    | <input type="checkbox"/> একেবারেই না | <input type="checkbox"/> সামান্য | <input type="checkbox"/> মাঝামাঝি | <input type="checkbox"/> বেশ কিছুটা | <input type="checkbox"/> খুব বেশি |
| ১৪. পায়খানার সমস্যার কারণে আমি অন্যদের বিরক্ত করি বলে মনে হয়।                 | <input type="checkbox"/> একেবারেই না | <input type="checkbox"/> সামান্য | <input type="checkbox"/> মাঝামাঝি | <input type="checkbox"/> বেশ কিছুটা | <input type="checkbox"/> খুব বেশি |
| ১৫. আমার ভয় হয় যে ভবিষ্যতে আমার পায়খানার সমস্যা আরও বেড়ে যাবে।              | <input type="checkbox"/> একেবারেই না | <input type="checkbox"/> সামান্য | <input type="checkbox"/> মাঝামাঝি | <input type="checkbox"/> বেশ কিছুটা | <input type="checkbox"/> খুব বেশি |
| ১৬. পায়খানার সমস্যার কারণে আমি বিরক্ত বোধ করি।                                 | <input type="checkbox"/> একেবারেই না | <input type="checkbox"/> সামান্য | <input type="checkbox"/> মাঝামাঝি | <input type="checkbox"/> বেশ কিছুটা | <input type="checkbox"/> খুব বেশি |
| ১৭. আমার দুশ্চিন্তা হয় যে সকলে ভাবে আমি পায়খানার সমস্যার কথা বাড়িয়ে বলছি।   | <input type="checkbox"/> একেবারেই না | <input type="checkbox"/> সামান্য | <input type="checkbox"/> মাঝামাঝি | <input type="checkbox"/> বেশ কিছুটা | <input type="checkbox"/> খুব বেশি |

|                                                                                              |                                      |                                  |                                   |                                     |                                   |
|----------------------------------------------------------------------------------------------|--------------------------------------|----------------------------------|-----------------------------------|-------------------------------------|-----------------------------------|
| ১৮. পায়খানার সমস্যার কারণে কিছু একটা অসম্পূর্ণ থেকে গেছে বলে আমার মনে হয়।                  | <input type="checkbox"/> একেবারেই না | <input type="checkbox"/> সামান্য | <input type="checkbox"/> মাঝামাঝি | <input type="checkbox"/> বেশ কিছুটা | <input type="checkbox"/> খুব বেশি |
| ১৯. পায়খানার সমস্যার কারণে মানসিক চাপের পরিস্থিতি এড়িয়ে চলতে হয়।                         | <input type="checkbox"/> একেবারেই না | <input type="checkbox"/> সামান্য | <input type="checkbox"/> মাঝামাঝি | <input type="checkbox"/> বেশ কিছুটা | <input type="checkbox"/> খুব বেশি |
| ২০. পায়খানার সমস্যা আমার যৌন ইচ্ছা কমিয়ে দিয়েছে।                                          | <input type="checkbox"/> একেবারেই না | <input type="checkbox"/> সামান্য | <input type="checkbox"/> মাঝামাঝি | <input type="checkbox"/> বেশ কিছুটা | <input type="checkbox"/> খুব বেশি |
| ২১. পায়খানার সমস্যার কারণে আমি পছন্দমতো জামাকাপড় পড়তে পারি না।                            | <input type="checkbox"/> একেবারেই না | <input type="checkbox"/> সামান্য | <input type="checkbox"/> মাঝামাঝি | <input type="checkbox"/> বেশ কিছুটা | <input type="checkbox"/> খুব বেশি |
| ২২. পায়খানার সমস্যার কারণে শারীরিক পরিশ্রমের কাজ আমাকে এড়িয়ে চলতে হয়।                    | <input type="checkbox"/> একেবারেই না | <input type="checkbox"/> সামান্য | <input type="checkbox"/> মাঝামাঝি | <input type="checkbox"/> বেশ কিছুটা | <input type="checkbox"/> খুব বেশি |
| ২৩. পায়খানার সমস্যার কারণে আমি কি ধরনের খাবার খাচ্ছি, তা লক্ষ্য রাখতে হয়।                  | <input type="checkbox"/> একেবারেই না | <input type="checkbox"/> সামান্য | <input type="checkbox"/> মাঝামাঝি | <input type="checkbox"/> বেশ কিছুটা | <input type="checkbox"/> খুব বেশি |
| ২৪. পায়খানার সমস্যার কারণে অপরিচিত লোকজনের সঙ্গে আমার থাকতে অসুবিধা হয়।                    | <input type="checkbox"/> একেবারেই না | <input type="checkbox"/> সামান্য | <input type="checkbox"/> মাঝামাঝি | <input type="checkbox"/> বেশ কিছুটা | <input type="checkbox"/> খুব বেশি |
| ২৫. পায়খানার সমস্যার কারণে আমি অলস ও মস্তুর বোধ করি।                                        | <input type="checkbox"/> একেবারেই না | <input type="checkbox"/> সামান্য | <input type="checkbox"/> মাঝামাঝি | <input type="checkbox"/> বেশ কিছুটা | <input type="checkbox"/> খুব বেশি |
| ২৬. পায়খানার সমস্যার কারণে আমার নিজের অপরিচ্ছন্ন বোধ হয়।                                   | <input type="checkbox"/> একেবারেই না | <input type="checkbox"/> সামান্য | <input type="checkbox"/> মাঝামাঝি | <input type="checkbox"/> বেশ কিছুটা | <input type="checkbox"/> খুব বেশি |
| ২৭. পায়খানার সমস্যার কারণে দূরে কোথাও যাওয়া আমার পক্ষে কঠিন হয়ে যায়।                     | <input type="checkbox"/> একেবারেই না | <input type="checkbox"/> সামান্য | <input type="checkbox"/> মাঝামাঝি | <input type="checkbox"/> বেশ কিছুটা | <input type="checkbox"/> খুব বেশি |
| ২৮. পায়খানার সমস্যার কারণে যখন যা ইচ্ছা খেতে না পারায় আমি নিরাশ বোধ করি।                   | <input type="checkbox"/> একেবারেই না | <input type="checkbox"/> সামান্য | <input type="checkbox"/> মাঝামাঝি | <input type="checkbox"/> বেশ কিছুটা | <input type="checkbox"/> খুব বেশি |
| ২৯. পায়খানার সমস্যার কারণে কাছাকাছি কোথাও পায়খানা করার জায়গা থাকা আমার কাছে গুরুত্বপূর্ণ। | <input type="checkbox"/> একেবারেই না | <input type="checkbox"/> সামান্য | <input type="checkbox"/> মাঝামাঝি | <input type="checkbox"/> বেশ কিছুটা | <input type="checkbox"/> খুব বেশি |
| ৩০. পায়খানার সমস্যাকে কেন্দ্র করেই আমার জীবন ঘুরপাক খায়।                                   | <input type="checkbox"/> একেবারেই না | <input type="checkbox"/> সামান্য | <input type="checkbox"/> মাঝামাঝি | <input type="checkbox"/> বেশ কিছুটা | <input type="checkbox"/> খুব বেশি |
| ৩১. আমার দুশ্চিন্তা হয় যে পায়খানার উপর থেকে আমার নিয়ন্ত্রণ হারিয়ে যাবে।                  | <input type="checkbox"/> একেবারেই না | <input type="checkbox"/> সামান্য | <input type="checkbox"/> মাঝামাঝি | <input type="checkbox"/> বেশ কিছুটা | <input type="checkbox"/> খুব বেশি |
| ৩২. আমার প্রায়শই ভয় হয় যে আমার পায়খানা হবে না।                                           | <input type="checkbox"/> একেবারেই না | <input type="checkbox"/> সামান্য | <input type="checkbox"/> মাঝামাঝি | <input type="checkbox"/> বেশ কিছুটা | <input type="checkbox"/> খুব বেশি |
| ৩৩. পায়খানার সমস্যা আমার নিকট সম্পর্কগুলিকে নষ্ট করছে।                                      | <input type="checkbox"/> একেবারেই না | <input type="checkbox"/> সামান্য | <input type="checkbox"/> মাঝামাঝি | <input type="checkbox"/> বেশ কিছুটা | <input type="checkbox"/> খুব বেশি |
| ৩৪. আমার মনে হয় যে কেউ আমার পায়খানার সমস্যার কথা বোঝে না।                                  | <input type="checkbox"/> একেবারেই না | <input type="checkbox"/> সামান্য | <input type="checkbox"/> মাঝামাঝি | <input type="checkbox"/> বেশ কিছুটা | <input type="checkbox"/> খুব বেশি |
